# Supplementary material
Source: PubMed Central journal article supplement (PMC6613306)
Supplement: jamaoncol-5-1268-s002.pdf [file jamaoncol-5-1268-s002.pdf]

## Supplementary Online Content

Pietrantonio F, Morano F, Corallo S, et al. Maintenance therapy with panitumumab vs panitumumab plus fluorouracil-leucovorin in patients with *RAS* wild-type metastatic colorectal cancer: a phase 2 randomized clinical trial. *JAMA Oncol*. Published online July 3, 2019. doi: 10.1001/jamaoncol.2019.1467

**eTable 1.** Baseline Characteristics

**eTable 2.** Efficacy and Activity Measures in Intention-to-Treat Population

**Table 3.** Safety Analysis: Adverse Events During Induction and Maintenance and During Maintenance

**eFigure 1.** Trial Design

**eFigure 2.** Duration of Response According to Treatment Arm in the Subgroup of Patients With Objective Tumor Response According to RECIST, Version 1.1

**eFigure 3.** Forest Plots of Overall Survival by Patient Subgroups Within the Intention-to-Treat Population

**eFigure 4.** Kaplan-Meier Curves for Progression Free-Survival and Overall Survival According to Treatment Arm in the Per Protocol Population

**eMethods.** Details on Dose Reductions During Study Treatment

This supplementary material has been provided by the authors to give readers additional information about their work.

**eTable 1. Baseline Characteristics**

|                            | <b>panitumumab plus<br/>5-FU/LV<br/>(n = 117)</b> | <b>panitumumab<br/>(n = 112)</b> | <b>*p</b> |
|----------------------------|---------------------------------------------------|----------------------------------|-----------|
| Median age (years, IQR)    | 62.6 (55-71)                                      | 62.4 (64-70)                     | 0.638     |
| Gender                     |                                                   |                                  | 0.889     |
| Male                       | 79 (67%)                                          | 74 (66%)                         |           |
| Female                     | 38 (33%)                                          | 38 (34%)                         |           |
| ECOG performance status    |                                                   |                                  | 1.000     |
| 0                          | 84 (72%)                                          | 81 (72%)                         |           |
| 1                          | 33 (28%)                                          | 31 (28%)                         |           |
| Prior adjuvant treatment   |                                                   |                                  | 0.718     |
| Yes                        | 17 (14%)                                          | 19 (17%)                         |           |
| No                         | 100 (86%)                                         | 93 (83%)                         |           |
| Primary tumor resected     |                                                   |                                  | 0.787     |
| Yes                        | 73 (62%)                                          | 72 (64%)                         |           |
| No                         | 44 (38%)                                          | 40 (36%)                         |           |
| Liver-limited disease      |                                                   |                                  | 0.891     |
| Yes                        | 42 (36%)                                          | 39 (35%)                         |           |
| No                         | 75 (64%)                                          | 73 (65%)                         |           |
| Synchronous metastases     |                                                   |                                  | 0.273     |
| Yes                        | 94 (80%)                                          | 83 (74%)                         |           |
| No                         | 23 (20%)                                          | 29 (26%)                         |           |
| Number of metastatic sites |                                                   |                                  | 0.596     |
| 1                          | 63 (53%)                                          | 64 (58%)                         |           |
| > 1                        | 54 (47%)                                          | 48 (42%)                         |           |
| Primary tumor location     |                                                   |                                  | 0.730     |
| Right                      | 19 (16%)                                          | 21 (20%)                         |           |
| Left                       | 98 (84%)                                          | 91 (80%)                         |           |
| <i>BRAF</i> status         |                                                   |                                  | 0.325     |
| Wild-type                  | 114 (97%)                                         | 106 (95%)                        |           |
| Mutated                    | 3 (3%)                                            | 6 (5%)                           |           |

\* p value at Mann-Whitney, or chi-square or Fisher test for categorical variables, respectively.

Data are median with interquartile range (IQR) or number (%).

Abbreviations: ECOG, Eastern Cooperative Oncology Group; 5-FU/LV, 5-fluorouracil/leucovorin.

**eTable 2. Efficacy and Activity Measures in Intention-to-Treat Population**

|                                | <b>panitumumab plus 5-FU/LV<br/>(n = 117)</b> | <b>panitumumab<br/>(n = 112)</b> | <b>effect size<br/>(95% CI)</b> | <b>p value</b> |
|--------------------------------|-----------------------------------------------|----------------------------------|---------------------------------|----------------|
| Progression-Free Survival      |                                               |                                  | HR 1.51 (1.11-2.07)             | 0.009          |
| Median, months (95% CI)        | 12.0 (10.4-14.5)                              | 9.9 (8.4 to 11.0)                |                                 |                |
| 10-month estimate (95% CI)     | 59.9% (51.5-69.8)                             | 49.0% (40.5-59.4)                |                                 |                |
| Overall Survival               |                                               |                                  | HR 1.13 (0.71-1.81)             | 0.820          |
| 12-month estimate (95% CI)     | 85.4% (79.0-92.3)                             | 79.7% (72.4-87.7)                |                                 |                |
| 24-month estimate (95% CI)     | 60.7% (50.6-72.9)                             | 60.0% (49.5-72.7)                |                                 |                |
| Overall Response Rate (95% CI) | 66.7% (57.4-75.1)                             | 67.0% (57.4-75.6)                | OR 1.07 (0.61-1.86)             | 0.817          |
| Complete Response              | 6.0%                                          | 4.5%                             |                                 |                |
| Partial Response               | 60.7%                                         | 62.5%                            |                                 |                |
| Stable Disease                 | 16.2%                                         | 17.0%                            |                                 |                |
| Progressive Disease            | 6.0%                                          | 6.2%                             |                                 |                |
| Not Evaluable                  | 11.1%                                         | 9.8%                             |                                 |                |
| Disease Control Rate (95% CI)  | 82.9% (74.8-82.9)                             | 83.9% (75.8-90.2)                | OR 1.06 (0.52-2.15)             | 0.871          |
| Duration of Response           |                                               |                                  | -                               | 0.156          |
| Median, months (IQR)           | 10.9 (5.8-21.0)                               | 9.0 (5.9-14.7)                   |                                 |                |

Abbreviations: 5-FU/LV, 5-fluorouracil/leucovorin. CI: confidence interval. HR: hazard ratio estimate (95% CI) of panitumumab vs panitumumab plus 5-FU/LV in the univariable Cox model stratified by prior adjuvant therapy and number of disease sites. OR: pooled response odds ratio (95% CI) of panitumumab vs panitumumab plus 5-FU/LV across the strata determined according to the stratification factors (prior adjuvant therapy and number of disease sites), and corresponding 95% CI.

**Table 3. Safety Analysis: Adverse Events During Induction and Maintenance and During Maintenance**

| Adverse event                               | Induction and Maintenance  |                 |                 |                 |                   |                 | Maintenance               |                 |                 |                 |                   |                 |
|---------------------------------------------|----------------------------|-----------------|-----------------|-----------------|-------------------|-----------------|---------------------------|-----------------|-----------------|-----------------|-------------------|-----------------|
|                                             | pan plus 5-FU/LV (n = 115) |                 | pan (n = 111)   |                 | Overall (n = 226) |                 | pan plus 5-FU/LV (n = 85) |                 | pan (n = 79)    |                 | Overall (n = 164) |                 |
|                                             | Any Grade n (%)            | ≥ 3 Grade n (%) | Any Grade n (%) | ≥ 3 Grade n (%) | Any Grade n (%)   | ≥ 3 Grade n (%) | Any Grade n (%)           | ≥ 3 Grade n (%) | Any Grade n (%) | ≥ 3 Grade n (%) | Any Grade n (%)   | ≥ 3 Grade n (%) |
| Stomatitis/Oral mucositis                   | 54 (47)                    | 11 (10)         | 44 (40)         | 8 (7)           | 98 (43)           | 19 (8)          | 28 (33)                   | 6 (7)           | 6 (8)           | 1 (1)           | 34 (21)           | 7 (4)           |
| Nausea                                      | 36 (31)                    | 3 (3)           | 41 (37)         | 2 (2)           | 77 (34)           | 5 (2)           | 8 (9)                     | 0               | 6 (8)           | 0               | 14 (9)            | 0               |
| Vomiting                                    | 23 (20)                    | 2 (2)           | 17 (15)         | 1 (1)           | 40 (18)           | 3 (1)           | 5 (6)                     | 1 (1)           | 0               | 0               | 5 (3)             | 1 (1)           |
| Diarrhea                                    | 59 (51)                    | 15 (13)         | 59 (53)         | 15 (14)         | 118 (52)          | 30 (13)         | 21 (25)                   | 4 (5)           | 8 (10)          | 1 (1)           | 29 (18)           | 5 (3)           |
| Hand-foot syndrome                          | 28 (24)                    | 4 (3)           | 19 (17)         | 2 (2)           | 47 (21)           | 6 (3)           | 14 (16)                   | 3 (4)           | 9 (11)          | 2 (3)           | 23 (14)           | 5 (3)           |
| Peripheral Neuropathy                       | 48 (42)                    | 3 (3)           | 36 (32)         | 4 (4)           | 84 (37)           | 7 (3)           | 25 (29)                   | 0               | 12 (15)         | 1 (1)           | 37 (23)           | 1 (1)           |
| Anemia                                      | 22 (19)                    | 2 (2)           | 16 (14)         | 2 (2)           | 38 (17)           | 4 (2)           | 8 (9)                     | 1 (1)           | 5 (6)           | 1 (1)           | 13 (8)            | 2 (1)           |
| Thrombocytopenia                            | 28 (24)                    | 2 (2)           | 22 (20)         | 4 (4)           | 50 (22)           | 6 (3)           | 7 (8)                     | 0               | 2 (3)           | 0               | 9 (5)             | 0               |
| Neutropenia                                 | 46 (40)                    | 26 (23)         | 48 (43)         | 31 (28)         | 94 (42)           | 57 (25)         | 9 (11)                    | 2 (2)           | 1 (1)           | 0               | 10 (6)            | 2 (1)           |
| Febrile Neutropenia                         | 3 (3)                      | 3 (3)           | 3 (3)           | 3 (3)           | 6 (3)             | 6 (3)           | 0                         | 0               | 0               | 0               | 0                 | 0               |
| Fatigue                                     | 51 (44)                    | 5 (4)           | 48 (43)         | 6 (5)           | 99 (44)           | 11 (5)          | 18 (21)                   | 1 (1)           | 13 (16)         | 1 (1)           | 31 (19)           | 2 (1)           |
| Infusion Reaction                           | 12 (10)                    | 2 (2)           | 12 (11)         | 1 (1)           | 24 (11)           | 3 (1)           | 2 (2)                     | 0               | 1 (1)           | 0               | 3 (2)             | 0               |
| <i>Pan-related AE</i>                       | 102 (89)                   | 46 (40)         | 101 (91)        | 42 (38)         | 203 (90)          | 88 (39)         | 65 (76)                   | 27 (32)         | 33 (42)         | 13 (16)         | 108 (66)          | 40 (24)         |
| Skin rash                                   | 96 (83)                    | 27 (23)         | 95 (86)         | 33 (28)         | 191 (85)          | 60 (27)         | 52 (61)                   | 21 (25)         | 35 (44)         | 12 (15)         | 87 (53)           | 33 (20)         |
| Paronychia                                  | 20 (17)                    | 2 (2)           | 16 (14)         | 1 (1)           | 36 (16)           | 3 (1)           | 13 (15)                   | 2 (2)           | 10 (13)         | 1 (1)           | 23 (14)           | 3 (2)           |
| Hypomagnesemia                              | 45 (39)                    | 4 (3)           | 42 (38)         | 1 (1)           | 87 (38)           | 5 (2)           | 23 (27)                   | 3 (4)           | 16 (20)         | 1 (1)           | 39 (24)           | 4 (2)           |
| Conjunctivitis                              | 21 (18)                    | 3 (3)           | 20 (18)         | 0               | 41 (18)           | 3 (1)           | 14 (16)                   | 3 (4)           | 8 (10)          | 0               | 22 (13)           | 3 (2)           |
| <i>AE Non-treatment related of interest</i> | 37 (32)                    | 18 (16)         | 29 (26)         | 8 (7)           | 66 (29)           | 26 (12)         | 18 (21)                   | 5 (6)           | 10 (13)         | 2 (3)           | 28 (17)           | 7 (4)           |
| Thromboembolic event                        | 13 (11)                    | 8 (7)           | 7 (6)           | 1 (1)           | 20 (9)            | 9 (4)           | 5 (6)                     | 3 (4)           | 0               | 0               | 5 (3)             | 3 (2)           |
| Gastrointestinal Obstruction                | 8 (7)                      | 5 (4)           | 11 (10)         | 3 (3)           | 19 (8)            | 8 (4)           | 3 (4)                     | 2 (2)           | 3 (4)           | 0               | 6 (4)             | 2 (1)           |
| Infection                                   | 24 (21)                    | 7 (6)           | 21 (19)         | 5 (5)           | 45 (20)           | 12 (5)          | 13 (15)                   | 2 (2)           | 8 (10)          | 2 (3)           | 21 (13)           | 4 (2)           |

Abbreviations: pan, panitumumab; 5-FU/LV, 5-fluorouracil/leucovorin; AE, adverse event

## eFigure 1. Trial Design

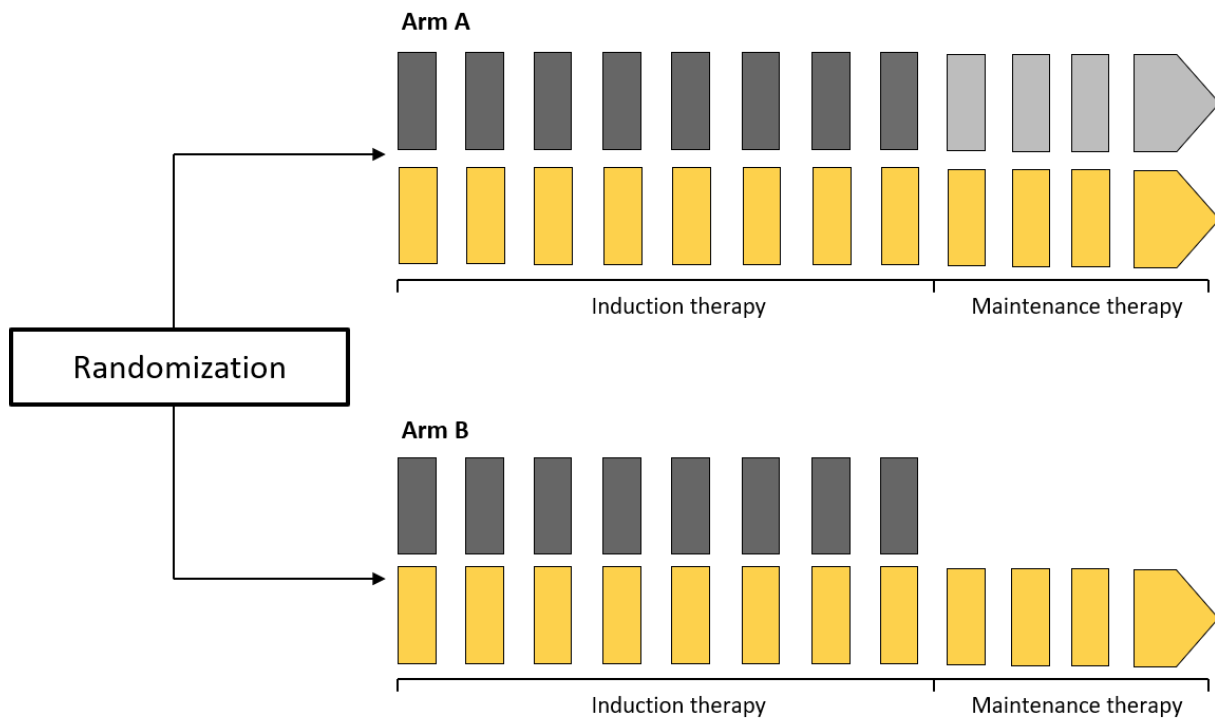

This figure depicts the graphic representation of the Valentino trial design, considering both induction and maintenance treatment. Specifically, yellow boxes represent panitumumab cycles, black boxes FOLFOX-4 chemotherapy cycles, and grey boxes 5-FU/LV chemotherapy cycles.

**eFigure 2. Duration of Response According to Treatment Arm in the Subgroup of Patients With Objective Tumor Response According to RECIST, Version 1.1**

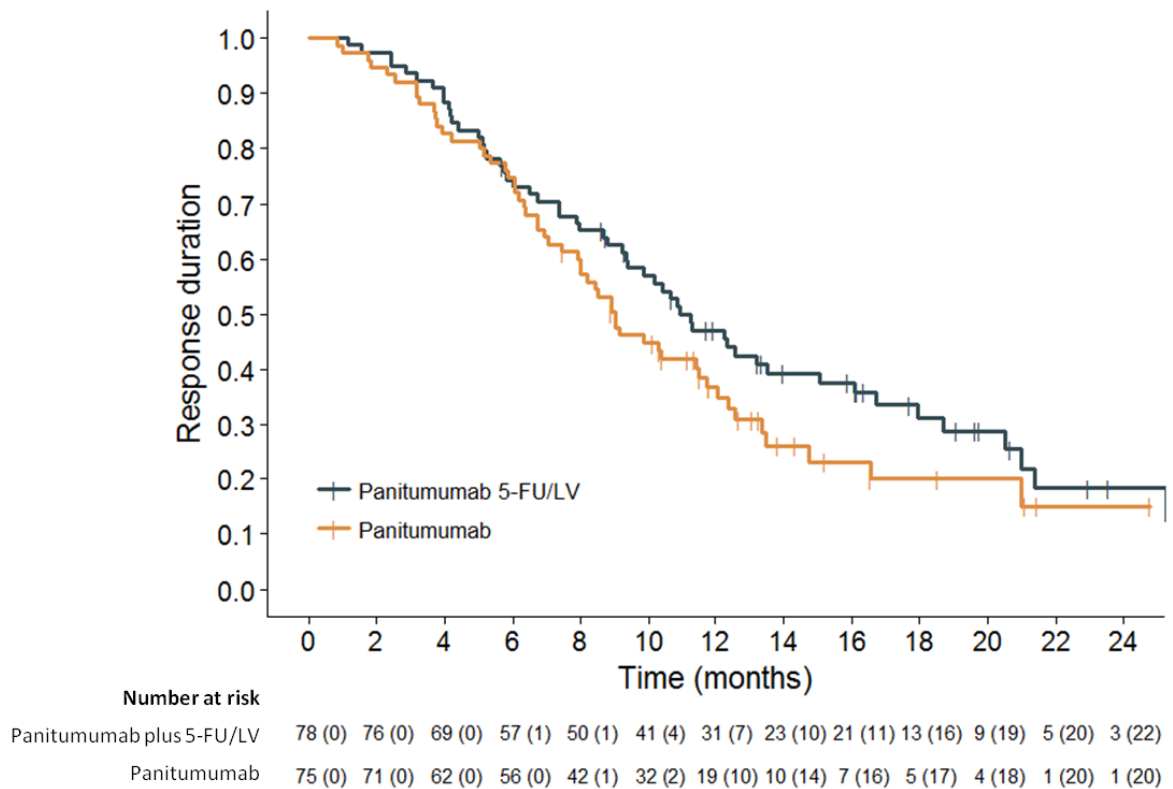

This figure illustrates the curve of duration of response to treatment in the subgroup of patients that achieved an objective tumor response according to RECIST vers 1.1. criteria. In green are reported data of patients in Arm A (panitumumab plus 5-FU/LV) and in yellow data of Arm B (panitumumab).

Abbreviations: 5-FU/LV= 5-fluorouracil plus leucovorin.

**eFigure 3. Forest Plots of Overall Survival by Patient Subgroups Within the Intention-to-Treat Population**

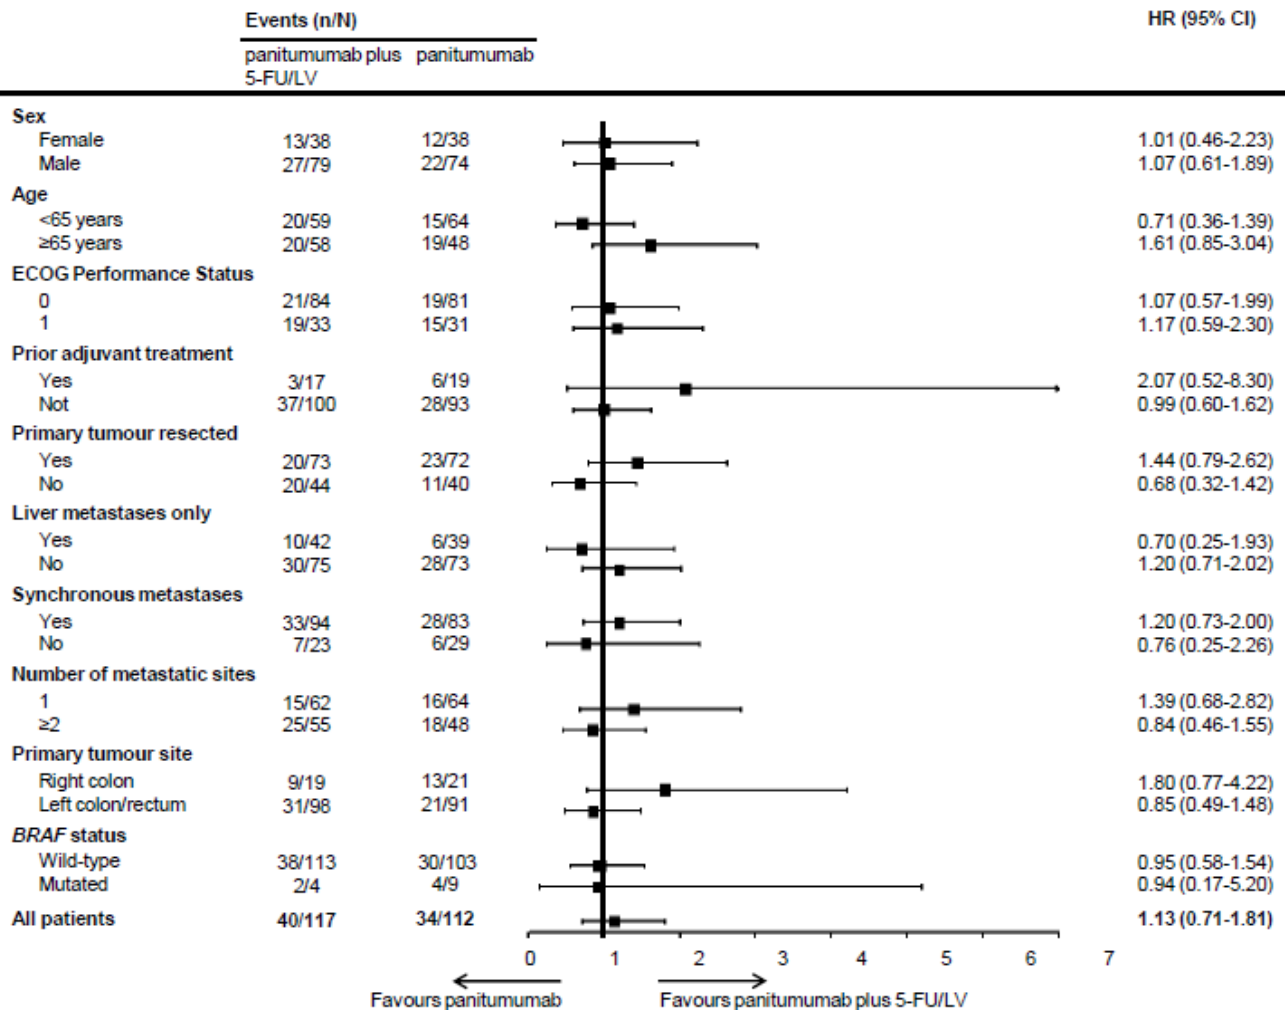

This figure depicts the Forest plots of overall survival in the intention-to-treat population, considering several patients subgroups.

Abbreviations: HR=Hazard ratio. ECOG: Eastern Cooperative Oncology Group. 5-FU/LV: 5-Fluorouracil and Leucovorin.

**eFigure 4. Kaplan-Meier Curves for Progression Free-Survival and Overall Survival According to Treatment Arm in the Per Protocol Population**

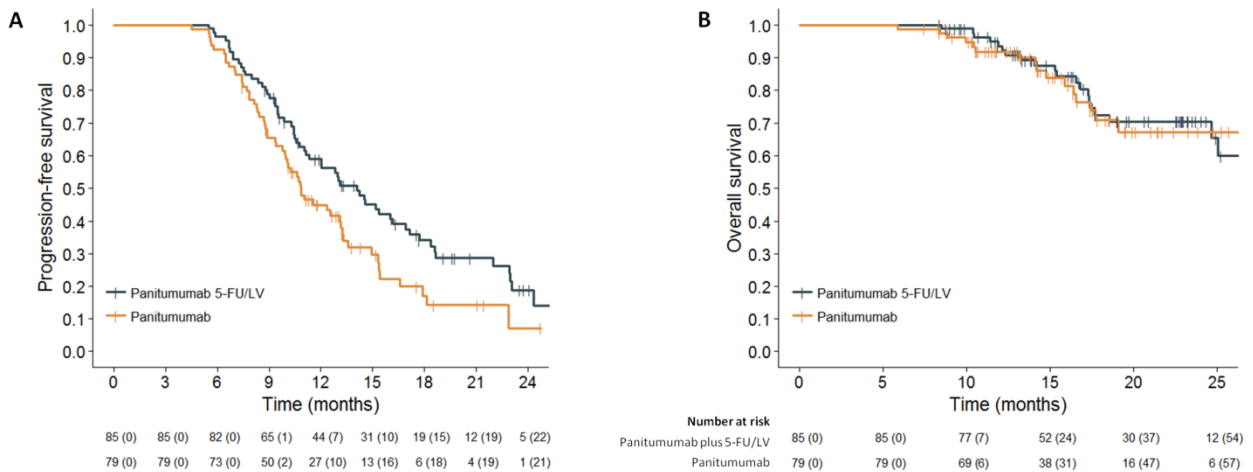

This figure illustrates the progression-free survival in part A and overall survival in part B curves in the per-protocol population at the date of first data cut-off (July 30, 2018), in green are reported data of patients in Arm A (panitumumab plus 5-FU/LV) and in yellow data of Arm B (panitumumab).

Abbreviations: Progression-free survival (A) and overall survival (B) at the date of first data cut-off (July 30, 2018). 5-FU/LV= 5-fluorouracil plus leucovorin. HR=hazard ratio. 95% CI=95% confidence interval.



## **eMethods. Details on Dose Reductions During Study Treatment and Study Centers**

A delay in treatment administration for drug-related AEs was necessary in 82 (71%) of the 115 patients treated in Arm A and 74 (67%) of the 111 patients in Arm B. Regarding the maintenance phase, the treatment was delayed for AEs in 36 (42%) of 85 patients in Arm A and 15 (19%) of 79 patients in Arm B. A dose reduction was needed for 79 (69%) patients in Arm A and 71 (64%) patients in Arm B. The drug-related toxicity was manageable in both treatment arms (table 3). Dose reductions at first and second level, as per protocol, were performed in 100 (44%) and 16 (7%) of 226 patients for 5FU, 88 (39%) and 7 (3%) for oxaliplatin and 66 (29%) and 22 (10%) for panitumumab. Considering the two treatment arms, oxaliplatin was reduced at the first and second dose level in 40% and 4% in panitumumab plus 5-FU/LV group and in 38% and 2% in single-agent panitumumab group, respectively, while panitumumab was reduced at the first and second dose level in 30% and 16% in panitumumab plus 5-FU/LV group and in 28% and 4% in single-agent panitumumab group, respectively. In the maintenance phase only, 28 (33%) of 85 patients in the panitumumab plus 5-FU/LV group and 8 (10%) of 79 in the single-agent panitumumab group, respectively, received a dose reduction for drug-related toxicity. Specifically, 5-FU bolus was reduced at the first and second dose level in 9% and 6% of patients, respectively, whereas reductions of 5-FU continuous infusion at the first and second dose level were performed in 12% and 5% of patients, respectively. Panitumumab was reduced at the first and second dose level in 14% and 16% of patients in the panitumumab plus 5-FU/LV arm, and in 9% and 1% of patients in the single-agent panitumumab arm, respectively.

## LIST OF ALL PARTICIPATING CENTERS

|      |                                                                    |
|------|--------------------------------------------------------------------|
| 0001 | Fondazione IRCCS Istituto Nazionale dei Tumori (Milano)            |
| 0002 | Ospedale Fatebenefratelli (Milano)                                 |
| 0003 | Ospedale Policlinico San Martino (Genova)                          |
| 0004 | Istituto Oncologico Veneto (Padova)                                |
| 0005 | Azienda Ospedaliero-Universitaria San Luigi Gonzaga (Orbassano)    |
| 0006 | Azienda Ospedaliera di Valtellina e Valchiavenna (Sondrio)         |
| 0007 | Humanitas Cancer Center (Rozzano)                                  |
| 0008 | Azienda Ospedaliero-Universitaria Pisana (Pisa)                    |
| 0009 | Istituto Europeo di Oncologia (Milano)                             |
| 0010 | Azienda Socio-Sanitaria Territoriale Bergamo Ovest (Treviglio)     |
| 0011 | Azienda Socio-Sanitaria Territoriale Ospedale di Cremona (Cremona) |
| 0012 | Fondazione Poliambulanza (Brescia)                                 |
| 0013 | Azienda Ospedaliera Città della Salute e della Scienza 1 (Torino)  |
| 0015 | Ospedali Galliera (Genova)                                         |
| 0016 | Azienda Ospedaliera Città della Salute e della Scienza 2 (Torino)  |
| 0017 | Ospedale San Gerardo (Monza)                                       |
| 0018 | Azienda Socio-Sanitaria Territoriale Lariana (Como)                |
| 0019 | Azienda Socio-Sanitaria Territoriale Sette Laghi (Varese)          |
| 0020 | Niguarda Cancer Center (Milano)                                    |
| 0021 | Azienda Socio-Sanitaria Territoriale di Vimercate                  |
| 0022 | Ospedale Santissima Annunziata (Chieti)                            |
| 0023 | Ospedale Floraspe Renzetti (Lanciano)                              |
| 0024 | Policlinico Umberto (Roma)                                         |
| 0025 | Azienda Ospedaliero-Universitaria Papardo (Messina)                |
| 0026 | Azienda Ospedaliero-Universitaria Careggi (Firenze)                |
| 0027 | Ospedale Di Summa Perrino (Brindisi)                               |
| 0028 | Istituto di Ricerca sul Cancro (Candiolo, To)                      |
| 0029 | Policlinico Tor Vergata (Roma)                                     |
| 0030 | Nuovo Ospedale di Prato                                            |
