# Supplementary material
Source: PubMed Central journal article supplement (PMC6613306)
Supplement: jamaoncol-5-1268-s003.pdf [file jamaoncol-5-1268-s003.pdf]

## Data Sharing Statement

Pietrantonio. Maintenance Therapy With Panitumumab Alone vs Panitumumab Plus Fluorouracil-Leucovorin in Patients With RAS Wild-Type Metastatic Colorectal Cancer. *JAMA Oncol.* Published July 03, 2019. 10.1001/jamaoncol.2019.1467

### Data

**Data available:** Yes

**Data types:** Deidentified participant data, Data dictionary

**How to access data:** specific data would be made available by the Principal Investigator upon personal and supported request

**When available:** With publication

### Supporting Documents

**Document types:** None

### Additional Information

**Who can access the data:** data would be made available to researchers whose proposed use of the data has been approved

**Types of analyses:** data would be made available for consultation for a specific declared and approved purpose

**Mechanisms of data availability:** after approval of a proposal and signed data access agreement
